# Supplementary material for: SLL1-ZH Regulates Spikelets Architecture and Grain Yield in Rice
Source: MDPI journal article supplement (doi:10.3390/agriculture11111162), 2021-11-18
Supplement: s1 [file s1]

Archive with 1 entries (1 files):
- agriculture-1451300-supplementary.pdf
