# Supplementary material for: SLL1-ZH Regulates Spikelets Architecture and Grain Yield in Rice
Source: MDPI journal article supplement (doi:10.3390/agriculture11111162), 2021-11-18
Supplement: s1 [file s1 › agriculture-1451300-supplementary.pdf]

# Supplementary Materials

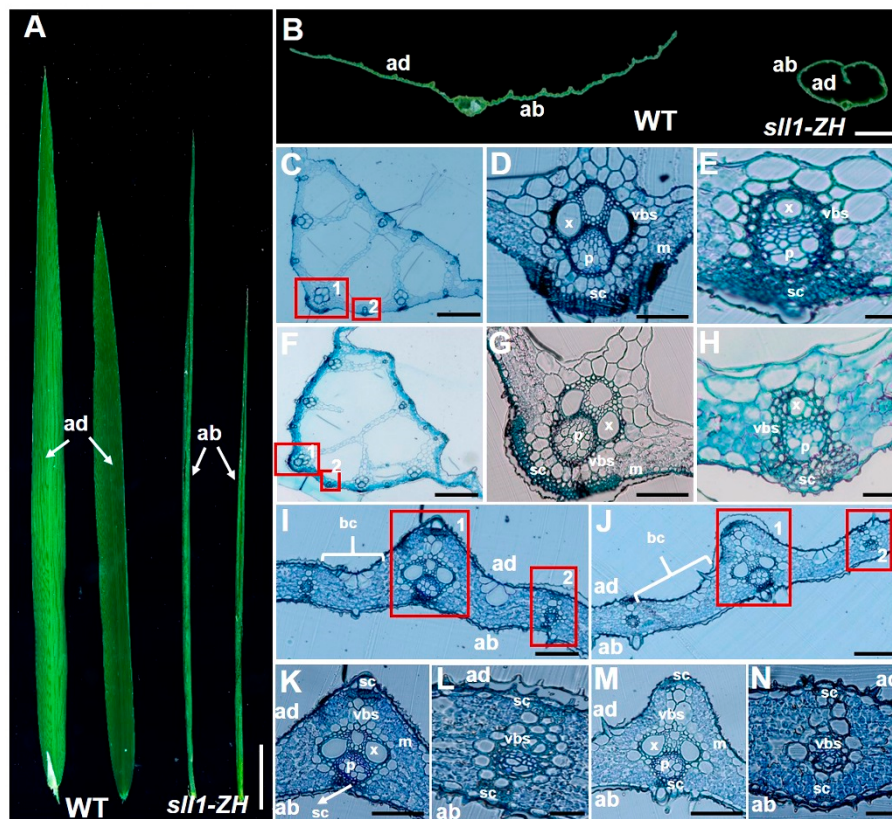

**Figure S1. Characterization of leaf in the wild-type and *sll1-ZH* mutant**

**A**, Representative phenotype of sword leaf and inverted two leaf in the wild type and the *sll1-ZH* mutant at heading stage. WT leaves showed unfolded adaxial, but the *sll1-ZH* mutant exhibited rolling abaxial. **B**, Free-hand sections of rolling leaf at the middle part of the sword leaf in the wild type and the *sll1-ZH* mutant at heading stage. WT leaves showed unfolded adaxial (above) and abaxial (below), but the *sll1-ZH* mutant exhibited rolling abaxial and circled adaxial. **C** and **F**, Trans-section of mid-vein of the sword leaf in the wild type and the *sll1-ZH* mutant. Mid-vein of WT were wider, while mid-vein of the *sll1-ZH* mutant were sharper. **D** and **G**, Microphotographs of headpiece region of mid-vein, enclosed in red box (1) of **C** and **F**, respectively. Sclerenchyma layer and mesophyll cells in the *sll1-ZH* mutant were thinner than that of WT, and the size of phloem cell, xylem, vascular bundle sheath were all smaller than that of WT. **E** and **H**, Microphotographs of small veins region of mid-vein, marked in red box (2) of **C** and **F**, respectively. The *sll1-ZH* mutant also displayed smaller phloem cell, xylem, vascular bundle sheath and thinner sclerenchyma layer. **I** and **J**, Trans-section of the margin of the blade in the wild type and the *sll1-ZH* mutant. The lateral veins in WT were

sharper, while that of mutant were smoother. The most obvious difference is the bulliform cells were deeper and narrower in WT but shallower and wider in the *slll-ZH* mutant. **K** and **M**, Microphotographs of the lateral vein region, marked in red box (1) of **E** and **H**, respectively. The *slll-ZH* mutant showed smaller phloem cell, xylem, vascular bundle sheath and thinner sclerenchyma layer and mesophyll cells at both sides. **L** and **N**, Macrophotographs of the small veins region, marked in red box (2) of **E** and **H**, respectively. The *slll-ZH* mutant showed smaller vascular bundle sheath region and thinner sclerenchyma at both sides. ab, abaxial; ad, adaxial; bc, bulliform cells; m, mesophyll cells; p, phloem; sc, sclerenchymatous cells; vbs, vascular bundle sheath; x, xylem. Bars 2 cm (**A**), 2 mm (**B**), 100  $\mu$ m (**C**, **F**, **I**, **J**) and 20  $\mu$ m (**D**, **E**, **G**, **H**, **K-N**)

**Table S1. Segregation analysis of the *slll-ZH* allele**

| Combination            | Seed-setting<br>rate of F <sub>1</sub> | F <sub>2</sub>          |                      | $\chi^2(3:1)$ | $\chi^2_{0.05}$ |
|------------------------|----------------------------------------|-------------------------|----------------------|---------------|-----------------|
|                        |                                        | No. of wild type plants | No. of mutant plants |               |                 |
| <i>slll-ZH</i> /Zh8015 | 77.62                                  | 309                     | 91                   | 1.08          | 3.84            |
| <i>slll-ZH</i> /02428  | 84.53                                  | 311                     | 89                   | 1.613         |                 |

**Table S2. Candidate genes in the fine-mapping region of *SLL1-ZH* locus**

| Gene number    | Putative function                                                | Biological Process       | Specific Expression Tissue of Homologs                    |
|----------------|------------------------------------------------------------------|--------------------------|-----------------------------------------------------------|
|                |                                                                  | Involved                 | in <i>Arabidopsis.t</i>                                   |
| LOC_Os09g23180 | Expressed Protein                                                | Unknown                  | Unknown                                                   |
| LOC_Os09g23190 | Putative En/Spm Sub-class Transposon<br>Protein with CACTA motif | Unknown                  | Unknown                                                   |
| LOC_Os09g23200 | SHAQKYF class MYB family                                         | Inflorescence Primordium | Carpel, Carpel Primordium, Cotyledon                      |
|                | transcription factor with GARP DNA-                              | Differentiation and Leaf | Primordium, Flower, Guard Cell, Nectary,                  |
|                | binding Domain                                                   | Development              | Phloem, Plant Embryo, Pollen, Root,<br>Seed, Stamen, Stem |

**Table S3. Primers and purpose used in this study**

| Primer | Forward primer (5'-3') | Reverse primer (5'-3') | Purpose |
|--------|------------------------|------------------------|---------|
|--------|------------------------|------------------------|---------|

|                   |                          |                          |                        |
|-------------------|--------------------------|--------------------------|------------------------|
| RM24222           | GAGAGATCGAGATCGCGAGAGG   | CCGGTTGTTCTCACCAATCAGG   | Linkage analysis       |
| RD6839            | GAACAGAGGAGGAGATCGAGAGG  | CTTCTTGGGAGATGCAGAAATGG  |                        |
| X14               | ATTTTGGTATTTGCAGG        | AGTACACGTAGGTGTGGTG      | Fine mapping           |
| X19               | GACAACAAACACAGAGC        | GGTGACAAAACAGACAC        |                        |
| X22               | TGATGTCCAAAACGTCGGC      | CTGGGTACAGTAGCAGTAC      |                        |
| X30               | AACAGATTTGACGCACTCCAA    | CCTCCATTTAATAATGTGACAC   |                        |
| X31               | CGGCATCTCTCTCTAACT       | AGTTTTCCTACAAGCTAGC      |                        |
| SLL1-ZH           | GCACATCAGCTTGCCGAG       | TGGTGGTACGAGCTGTAGAAT    | Sequencing             |
| <i>SLL1</i> -COM- | CCATGATTACGAATTCTGCACAGG | TACCGAGCTCGAATTCGGCGAGGA | Complementation vector |
| <i>EcoR</i> I     | GGTGTAAGAATTG            | ATGAGTGAATGA             | construction           |
| <i>SSL1</i> -ZH   | ATGGCTGTCGTCCAATTCTT     | TAGAGTGAACCTCGAGACTAGGG  | qPCR                   |
